# Supplementary material for: Protein Import into the Endosymbiotic Organelles of Apicomplexan Parasites
Source: PubMed Central journal article supplement (PMC6115763; doi:10.3390/genes9080412), 2018-08-14
Supplement: genes-09-00412-s001.pdf [file genes-09-00412-s001.pdf]

**Table 1 - Experimentally confirmed *Toxoplasma* mitochondrial proteins.** The table consists of proteins for which there is experimental support for mitochondrial localization, either from microscopy of tagging proteins or from co-IP with known mitochondrial partners. \*Mitochondrial sub-compartment is predicted according to the location of homologs in other studied organisms. \*\*matrix location is predicted due to the method of identification (matrix proximity tagging).

| Name      | Paper          | Gene ID or accession | MitoProt - probability of mito import | MitoProt cleavage site | Expected location* |
|-----------|----------------|----------------------|---------------------------------------|------------------------|--------------------|
| HSP28     | PMID: 16339717 | AY650281.2           | 0.1143                                | NP                     | matrix             |
| COX2A     | PMID: 29043530 | AAO27883             | 0.1817                                | 19                     | IM                 |
| COX2B     | PMID: 29043530 | AAO27882             | 0.7209                                | 26                     | IM                 |
| ClpB      | PMID: 29156781 | TGME49_268650        | 0.9284                                | 64                     | matrix             |
| TgPRELID  | PMID: 28168222 | TGGT1_254250         | 0.2139                                | NP                     | IMS                |
| HSP60     | PMID: 11163440 | AF116462             | 0.9299                                | 23                     | matrix             |
| GAD       | PMID: 23159057 | TGME49_280700        | 0.791                                 | 35                     | matrix             |
| SODB2     | PMID:14576360  | AY176062             | 0.2666                                | 40                     | matrix             |
| MutS      | PMID:19291232  | TGME49_218840        | 0.0044                                | NP                     | matrix             |
| Sam50     | PMID: 26381927 | TGME49_205570        | 0.1246                                | NP                     | OM                 |
| MAFI      | PMID: 24781109 | TGGT1_220950         | 0.0285                                | NP                     |                    |
| TgMys     | PMID: 28202940 | TGME49_215430        | 0.5146                                | 29                     | OM                 |
| RlmN      | PMID: 27991712 | TGME49_209790        | 0.0241                                | NP                     | TA                 |
| Elp3      | PMID: 23878194 | TGME49_305480        | 0.0054                                | NP                     | TA                 |
| FiS1      | PMID: 27991712 | TGME49_263323        | 0.0177                                | NP                     | TA                 |
| TgPyC     | PMID: 28726641 | TGGT1_284190         | 0.2579                                | NP                     | matrix             |
| TgPEPCKmt | PMID: 28726641 | TGGT1_289650         | 0.969                                 | 27                     | matrix             |
| TgPSD1mt  | PMID: 24429285 | DQ450198             | 0.9847                                | 97                     | matrix             |
| TgFPPS    | PMID: 17724033 | AY196327             | 0.9761                                | 150                    | matrix             |

|                                      |                                                                                                       |               |        |     |         |
|--------------------------------------|-------------------------------------------------------------------------------------------------------|---------------|--------|-----|---------|
| ICAP18, ATP syntase d subunit        | PMID: 22144892                                                                                        | TGME49_268830 | 0.9595 | 42  | matrix  |
| Hypothetical                         | PMID: 22144892                                                                                        | TGME49_249690 | 0.9984 | 110 |         |
| TgNDH2-I                             | PMID: 18786503                                                                                        | DQ211932      | 0.5819 | 24  | matrix  |
| TgNDH2-II                            | PMID: 18786503                                                                                        | DQ228957      | 0.9831 | 62  | matrix  |
| TgPyKII                              | PMID: 18326043                                                                                        | AB118155      | 0.1688 | 23  | bimodal |
| TgPRX3                               | PMID:7784785                                                                                          | AY251021      | 0.6273 | NP  | matrix  |
| TgSOD3                               | PMID:7784785                                                                                          | AY254045      | 0.9103 | NP  | matrix  |
| TgTPX1/2                             | PMID:7784785                                                                                          | AY633702      | 0.98   | 168 | bimodal |
| TgBCKDH                              | PMID: 25032958                                                                                        | TGME49_239490 | 0.4072 | 38  | matrix  |
| TgDHODH                              | PMID: 22580100                                                                                        | TGME49_210790 | 0.8899 | 39  | IM      |
| ICAP2 ATP synthase b subunit         | PMID: 27594426<br>BioRxiv <a href="https://doi.org/10.1101/314385">https://doi.org/10.1101/314385</a> | TGME49_231410 | 0.9652 | 41  | matrix  |
| ICAP3                                | PMID: 27594426                                                                                        | TGME49_215430 | 0.6056 | 29  |         |
| ICAP6                                | PMID: 27594426                                                                                        | TGME49_260180 | 0.9094 | 63  |         |
| ICAP8                                | PMID: 27594426                                                                                        | TGME49_218940 | 0.0002 | NP  |         |
| ICAP9                                | PMID: 27594426                                                                                        | TGME49_247410 | 0.2079 | NP  |         |
| ICAP11                               | PMID: 27594426                                                                                        | TGME49_215610 | 0.8564 | 29  |         |
| ICAP14                               | PMID: 27594426                                                                                        | TGME49_255245 | 0.9252 | 21  |         |
| ICAP15                               | PMID: 27594426                                                                                        | TGME49_282180 | 0.9777 | 44  |         |
| Citrate-synthase I (CS1)             | PMID:18336823                                                                                         | TGME49_268890 | 0.9991 | 87  | matrix  |
| Aconitase (ACN)                      | PMID:18336823                                                                                         | TGME49_226730 | 0.9936 | 119 | matrix  |
| Isocitrate-dehydrogenase I (IDH1)    | PMID:18336823                                                                                         | TGME49_313140 | 0.9129 | 166 | matrix  |
| Succinyl-CoA-synthetase alpha (SCSa) | PMID:18336823                                                                                         | TGME49_290600 | 0.7149 | 42  | matrix  |

|                                                                    |                                                                                     |               |        |     |          |
|--------------------------------------------------------------------|-------------------------------------------------------------------------------------|---------------|--------|-----|----------|
| Succinyl-CoA-synthetase<br>(ATP) (SCSb)                            | PMID:18336823                                                                       | TGME49_309752 | 0.9559 | 57  | matrix   |
| Malate-dehydrogenase (MDH)                                         | PMID:18336823                                                                       | TGME49_318430 | 0.2217 | 72  | matrix   |
| FAD Malate-dehydrogenase<br>(MDH-FAD)                              | PMID:18336823                                                                       | TGME49_288500 | 0.9886 | 98  | matrix   |
| putative ATP-dependent hsl<br>protease ATP-binding subunit<br>hslU | BioRxiv <a href="https://doi.org/10.1101/320184">https://doi.org/10.1101/320184</a> | TGGT1_210730  | 0.9204 | 95  | matrix** |
| RAP domain-containing<br>protein                                   | BioRxiv <a href="https://doi.org/10.1101/320184">https://doi.org/10.1101/320184</a> | TGGT1_213420  | 0.9499 | 131 | matrix** |
| ATPase, AFG1 family protein                                        | BioRxiv <a href="https://doi.org/10.1101/320184">https://doi.org/10.1101/320184</a> | TGGT1_217020  | 0.1463 | 13  | matrix** |
| phosphoribosylpyrophosphate<br>synthetase                          | BioRxiv <a href="https://doi.org/10.1101/320184">https://doi.org/10.1101/320184</a> | TGGT1_220100  | 0.5956 | 11  | matrix** |
| hypothetical                                                       | BioRxiv <a href="https://doi.org/10.1101/320184">https://doi.org/10.1101/320184</a> | TGGT1_223500  | 0.1031 | 26  | matrix** |
| hypothetical                                                       | BioRxiv <a href="https://doi.org/10.1101/320184">https://doi.org/10.1101/320184</a> | TGGT1_229620  | 0.9856 | 59  | matrix** |
| aspartate aminotransferase                                         | BioRxiv <a href="https://doi.org/10.1101/320184">https://doi.org/10.1101/320184</a> | TGGT1_248600  | 0.1823 | NP  | matrix** |
| TPR repeat region protein                                          | BioRxiv <a href="https://doi.org/10.1101/320184">https://doi.org/10.1101/320184</a> | TGGT1_258100  | 0.9766 | 96  | matrix** |
| protein kinase                                                     | BioRxiv <a href="https://doi.org/10.1101/320184">https://doi.org/10.1101/320184</a> | TGGT1_259710  | 0.9904 | 25  | matrix** |
| hypothetical                                                       | BioRxiv <a href="https://doi.org/10.1101/320184">https://doi.org/10.1101/320184</a> | TGGT1_260840  | 0.7802 | 36  | matrix** |
| hypothetical                                                       | BioRxiv <a href="https://doi.org/10.1101/320184">https://doi.org/10.1101/320184</a> | TGGT1_263080  | 0.8834 | NP  | matrix** |
| hypothetical                                                       | BioRxiv <a href="https://doi.org/10.1101/320184">https://doi.org/10.1101/320184</a> | TGGT1_263400  | 0.5318 | 48  | matrix** |
| hypothetical                                                       | BioRxiv <a href="https://doi.org/10.1101/320184">https://doi.org/10.1101/320184</a> | TGGT1_263840  | 0.1633 | NP  | matrix** |
| hypothetical                                                       | BioRxiv <a href="https://doi.org/10.1101/320184">https://doi.org/10.1101/320184</a> | TGGT1_265360  | 0.9455 | 29  | matrix** |
| hypothetical                                                       | BioRxiv <a href="https://doi.org/10.1101/320184">https://doi.org/10.1101/320184</a> | TGGT1_278250  | 0.0684 | NP  | matrix** |

|               |                                                                                                       |               |        |     |             |
|---------------|-------------------------------------------------------------------------------------------------------|---------------|--------|-----|-------------|
| hypothetical  | BioRxiv <a href="https://doi.org/10.1101/320184">https://doi.org/10.1101/320184</a>                   | TGGT1_278720  | 0.2222 | NP  | matrix**    |
| hypothetical  | BioRxiv <a href="https://doi.org/10.1101/320184">https://doi.org/10.1101/320184</a>                   | TGGT1_290460  | 0.998  | 54  | matrix**    |
| hypothetical  | BioRxiv <a href="https://doi.org/10.1101/320184">https://doi.org/10.1101/320184</a>                   | TGGT1_300030  | 0.1404 | NP  | matrix**    |
| hypothetical  | BioRxiv <a href="https://doi.org/10.1101/320184">https://doi.org/10.1101/320184</a>                   | TGGT1_275650  | 0.5658 | NP  | matrix**    |
| TgApiCox16    | BioRxiv <a href="https://doi.org/10.1101/320184">https://doi.org/10.1101/320184</a>                   | TGGT1_265370  |        |     | matrix**    |
| TgApiCox30    | BioRxiv <a href="https://doi.org/10.1101/320184">https://doi.org/10.1101/320184</a><br>PMID: 27594426 | TGGT1_297810  | 0.9486 | 85  | IM/matrix** |
| TgCox2A       | BioRxiv <a href="https://doi.org/10.1101/320184">https://doi.org/10.1101/320184</a><br>PMID: 18036550 | TGGT1_226590  | 0.1874 | 19  | IM/matrix** |
| TgCox2b       | BioRxiv <a href="https://doi.org/10.1101/320184">https://doi.org/10.1101/320184</a><br>PMID: 18036550 | TGGT1_310470  | 0.7121 | 26  | IM/matrix** |
| TgCox5b       | BioRxiv <a href="https://doi.org/10.1101/320184">https://doi.org/10.1101/320184</a>                   | TGGT1_209260  | 0.9872 | 75  | IM/matrix** |
| TgApiCox18    | BioRxiv <a href="https://doi.org/10.1101/320184">https://doi.org/10.1101/320184</a>                   | TGGT1_221510  | 0.9827 | 48  | IM/matrix** |
| TgApiCox23    | BioRxiv <a href="https://doi.org/10.1101/320184">https://doi.org/10.1101/320184</a>                   | TGGT1_262640  | 0.892  | 37  | IM/matrix** |
| TgApiCox19    | BioRxiv <a href="https://doi.org/10.1101/320184">https://doi.org/10.1101/320184</a>                   | TGGT1_247770  | 0.5905 | 27  | IM/matrix** |
| TgApiCox24    | BioRxiv <a href="https://doi.org/10.1101/320184">https://doi.org/10.1101/320184</a>                   | TGGT1_286530  | 0.9404 | 18  | IM/matrix** |
| TgApiCox26    | BioRxiv <a href="https://doi.org/10.1101/320184">https://doi.org/10.1101/320184</a>                   | TGGT1_306670  | 0.401  | NP  | IM/matrix** |
| Tom40         | PMID:27458014                                                                                         | TGME49_218280 | 0.5333 | NP  | OM          |
| Tom22         | PMID:27458014                                                                                         | TGME49_255245 | 0.9252 | 21  | OM          |
| Tom7          | PMID:27458014                                                                                         | TGME49_210255 | 0.9135 | 43  | OM          |
| Mpp- $\alpha$ | PMID:27458014                                                                                         | TGME49_202680 | 0.9985 | 64  | matrix      |
| Tim23         | PMID:27458014                                                                                         | TGME49_214150 | 0.1705 | NP  | IM          |
| Tim22         | PMID:27458014                                                                                         | TGME49_225710 | 0.0468 | NP  | IM          |
| Tim50         | PMID:27458014                                                                                         | TGME49_283590 | 0.9955 | 127 | IM          |
| Pam18         | PMID:27458014                                                                                         | TGME49_202810 | 0.9587 | 32  | IM          |
| hypothetical  | PMID:25691595                                                                                         | TGME49_295370 | 0.8954 | 58  |             |

|                                   |                                                                                     |               |        |    |        |
|-----------------------------------|-------------------------------------------------------------------------------------|---------------|--------|----|--------|
| ATP synthase OSCP                 | BioRxiv <a href="https://doi.org/10.1101/321620">https://doi.org/10.1101/321620</a> | TGME49_284540 | 0.986  | 34 | matrix |
| ATP synthase F0 subunits<br>alpha | BioRxiv <a href="https://doi.org/10.1101/321620">https://doi.org/10.1101/321620</a> | TGME49_310360 | 0.9422 | 16 | IM     |
| ASAP-11                           | BioRxiv <a href="https://doi.org/10.1101/321620">https://doi.org/10.1101/321620</a> | TGME49_290030 | 0.9902 | 37 |        |
| ASAP-14                           | BioRxiv <a href="https://doi.org/10.1101/321620">https://doi.org/10.1101/321620</a> | TGME49_254450 | 0.0579 | NP |        |
| ATP synthase beta subunit         | BioRxiv <a href="https://doi.org/10.1101/321620">https://doi.org/10.1101/321620</a> | TGME49_261950 | 0.997  | 67 | matrix |

---

\*according to location of homologs in other studied organisms.

\*\*matrix location is predicted due to the method of identification.
